# Supplementary material
Source: PubMed Central journal article supplement (PMC9936252)
Supplement: EIJ-D-22-00781_Rheude_SD.pdf [file EIJ-D-22-00781_Rheude_SD.pdf]

## Supplementary data

**Supplementary Table 1. Baseline characteristics according to polymer coating strategy in patients with moderate-severe coronary calcification.**

|                                       | <b>BP-DES<br/>(n=304)</b> | <b>PF-DES<br/>(n=755)</b> | <b>PP-DES<br/>(n=613)</b> | <b>p value</b> |
|---------------------------------------|---------------------------|---------------------------|---------------------------|----------------|
| Age, yrs                              | 68.7±11.1                 | 69.1±10.9                 | 69.6±10.2                 | 0.518          |
| Male                                  | 229 (75.3)                | 590 (78.1)                | 470 (76.7)                | 0.585          |
| Body Mass Index (kg/m <sup>2</sup> )  | 27.0±4.2                  | 27.8±4.8                  | 27.4±4.4                  | 0.029          |
| Diabetes mellitus                     | 110 (36.2)                | 243 (32.2)                | 211 (34.4)                | 0.416          |
| Insulin-dependent                     | 32 (10.5)                 | 95 (12.6)                 | 86 (14.0)                 | 0.321          |
| Arterial hypertension                 | 222 (73.0)                | 532 (70.5)                | 441 (71.9)                | 0.669          |
| Hyperlipidemia                        | 209 (68.8)                | 476 (63.0)                | 404 (65.9)                | 0.186          |
| Current smoker                        | 44 (14.5)                 | 130 (17.2)                | 81 (13.2)                 | 0.112          |
| Prior myocardial infarction           | 80 (26.3)                 | 216 (28.6)                | 199 (32.5)                | 0.114          |
| Prior coronary artery bypass grafting | 40 (13.2)                 | 87 (11.5)                 | 93 (15.2)                 | 0.139          |
| <b>Clinical presentation</b>          |                           |                           |                           |                |
| Acute myocardial infarction           | 37 (12.2)                 | 145 (19.2)                | 97 (15.8)                 | <0.001         |
| Unstable Angina                       | 100 (32.9)                | 133 (17.6)                | 147 (24.0)                |                |
| Stable Angina                         | 167 (54.9)                | 477 (63.2)                | 369 (60.2)                |                |
| Ejection fraction*, %                 | 53.2±11.6                 | 51.3±12.8                 | 52.4±11.6                 | 0.091          |
| 1-vessel disease                      | 31 (10.2)                 | 81 (10.7)                 | 49 (8.0)                  | 0.444          |
| 2-vessel disease                      | 70 (23.0)                 | 161 (21.3)                | 130 (21.2)                |                |

|                   |            |            |            |       |
|-------------------|------------|------------|------------|-------|
| 3-vessel disease  | 203 (66.8) | 513 (67.9) | 434 (70.8) |       |
| Number of lesions | 1.47±0.70  | 1.61±0.77  | 1.55±0.72  | 0.014 |

Values are n (%) or mean ± standard deviation unless otherwise indicated. \*Available in n=1,617 patients. BP: biodegradable polymer; DES: drug-eluting stent; PF: polymer free; PP: permanent polymer.

**Supplementary Table 2. Procedural characteristics according to polymer coating strategy in patients with moderate-severe coronary artery calcification.**

|                                 | <b>BP-DES<br/>(n=361)</b> | <b>PF-DES<br/>(n=966)</b> | <b>PP-DES<br/>(n=779)</b> | <b>p value</b> |
|---------------------------------|---------------------------|---------------------------|---------------------------|----------------|
| <b>Target vessel</b>            |                           |                           |                           |                |
| Left anterior descending artery | 164 (45.4)                | 436 (43.8)                | 360 (46.2)                | 0.498          |
| Left circumflex artery          | 96 (26.6)                 | 250 (25.1)                | 206 (26.4)                |                |
| Right coronary artery           | 101 (28.0)                | 310 (31.1)                | 213 (27.3)                |                |
| Chronic total occlusion         | 32 (8.9)                  | 84 (8.4)                  | 47 (6.0)                  | 0.105          |
| Complex morphology (B2/C)       | 314 (87.0)                | 886 (89.0)                | 677 (86.9)                | 0.359          |
| Bifurcation                     | 116 (32.1)                | 326 (32.7)                | 255 (32.7)                | 0.976          |
| Ostial                          | 72 (19.9)                 | 218 (21.9)                | 173 (22.2)                | 0.672          |
| Lesion length, mm               | 15.7±9.7                  | 17.9±10.3                 | 17.7±10.3                 | 0.001          |
| Vessel size, mm                 | 2.75±0.52                 | 2.76±0.50                 | 2.80±0.50                 | 0.190          |
| <b>Diameter stenosis, %</b>     |                           |                           |                           |                |
| Before procedure                | 66.2±15.8                 | 68.5±15.7                 | 68.0±15.1                 | 0.050          |
| After procedure                 | 12.6±9.7                  | 12.7±8.1                  | 12.5±8.1                  | 0.921          |
| Maximum balloon diameter, mm    | 3.06±0.53                 | 3.05±0.53                 | 3.09±0.53                 | 0.480          |
| Maximum balloon pressure, bar   | 16.4±3.1                  | 16.2±3.4                  | 16.3±3.4                  | 0.461          |
| Number of stents                | 1.8±0.7                   | 1.9±0.6                   | 1.9±0.8                   | 0.017          |
| Total stent length, mm          | 25.8±12.5                 | 28.3±13.2                 | 28.4±13.0                 | 0.003          |

Values are n (%) or mean ± standard deviation unless otherwise indicated.

BP: biodegradable polymer; DES: drug-eluting stent; PF: polymer free; PP: permanent polymer.

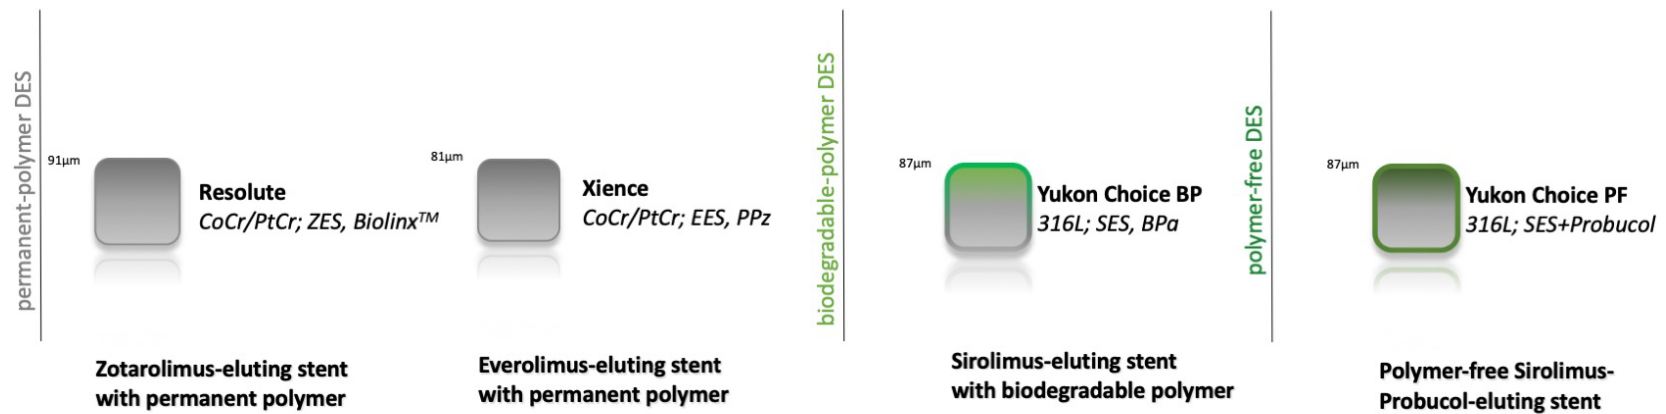

**Supplementary Figure 1.** Overview of principal characteristics of selected new-generation drug-eluting stents.

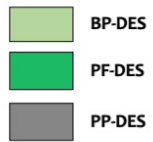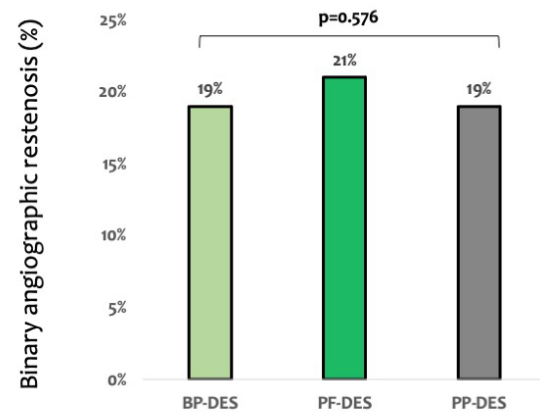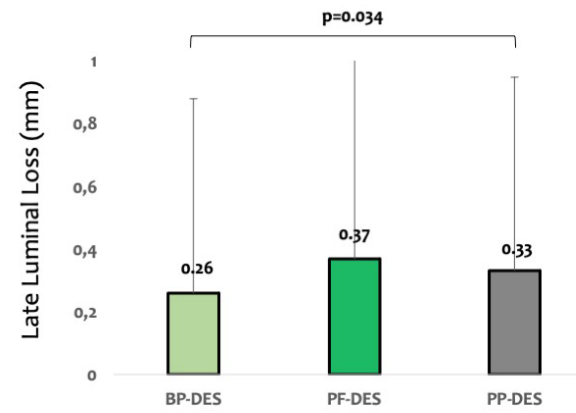

**Supplementary Figure 2.** Angiographic outcomes at 6-8 months according to polymer coating strategy in patients with moderate-severe coronary calcification.

3A.

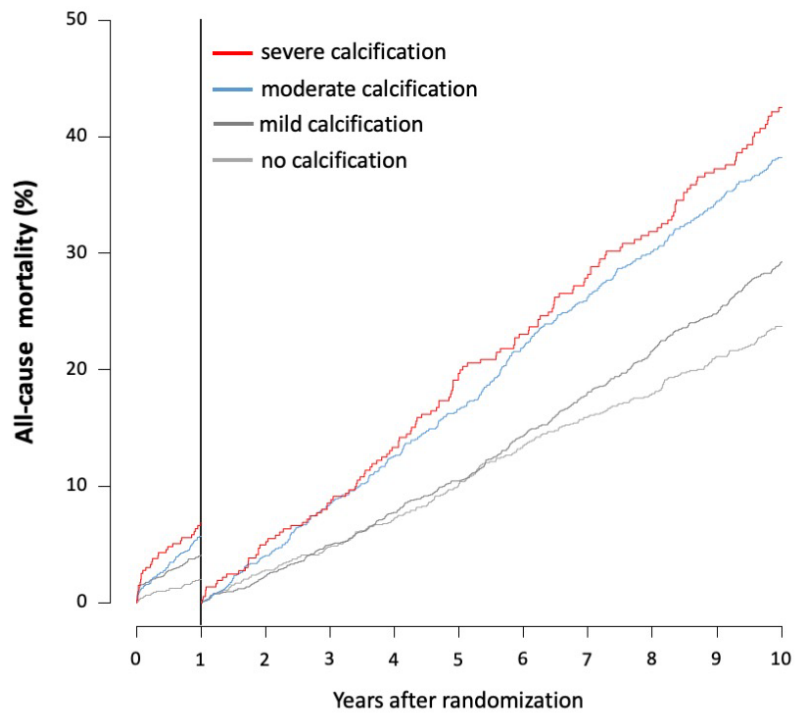

at 0-1 year

HR<sub>severe vs no</sub> 3.5 [2.0-6.1]

HR<sub>severe vs mild</sub> 1.7 [1.1-2.6]

HR<sub>severe vs moderate</sub> 1.2 [0.8-1.9]

at 1-10 years

HR<sub>severe vs no</sub> 2.0 [1.6-2.5]

HR<sub>severe vs mild</sub> 1.6 [1.3-2.0]

HR<sub>severe vs moderate</sub> 1.1 [0.9-1.4]

3B.

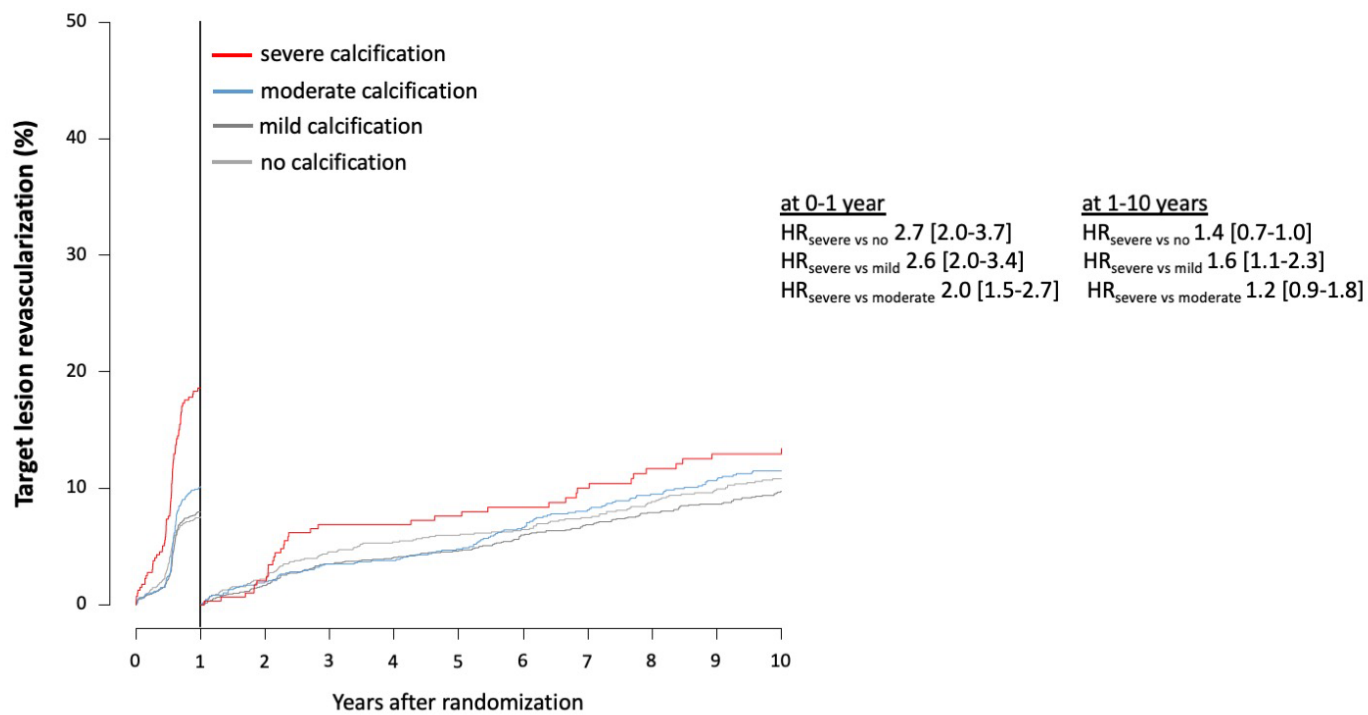

3C.

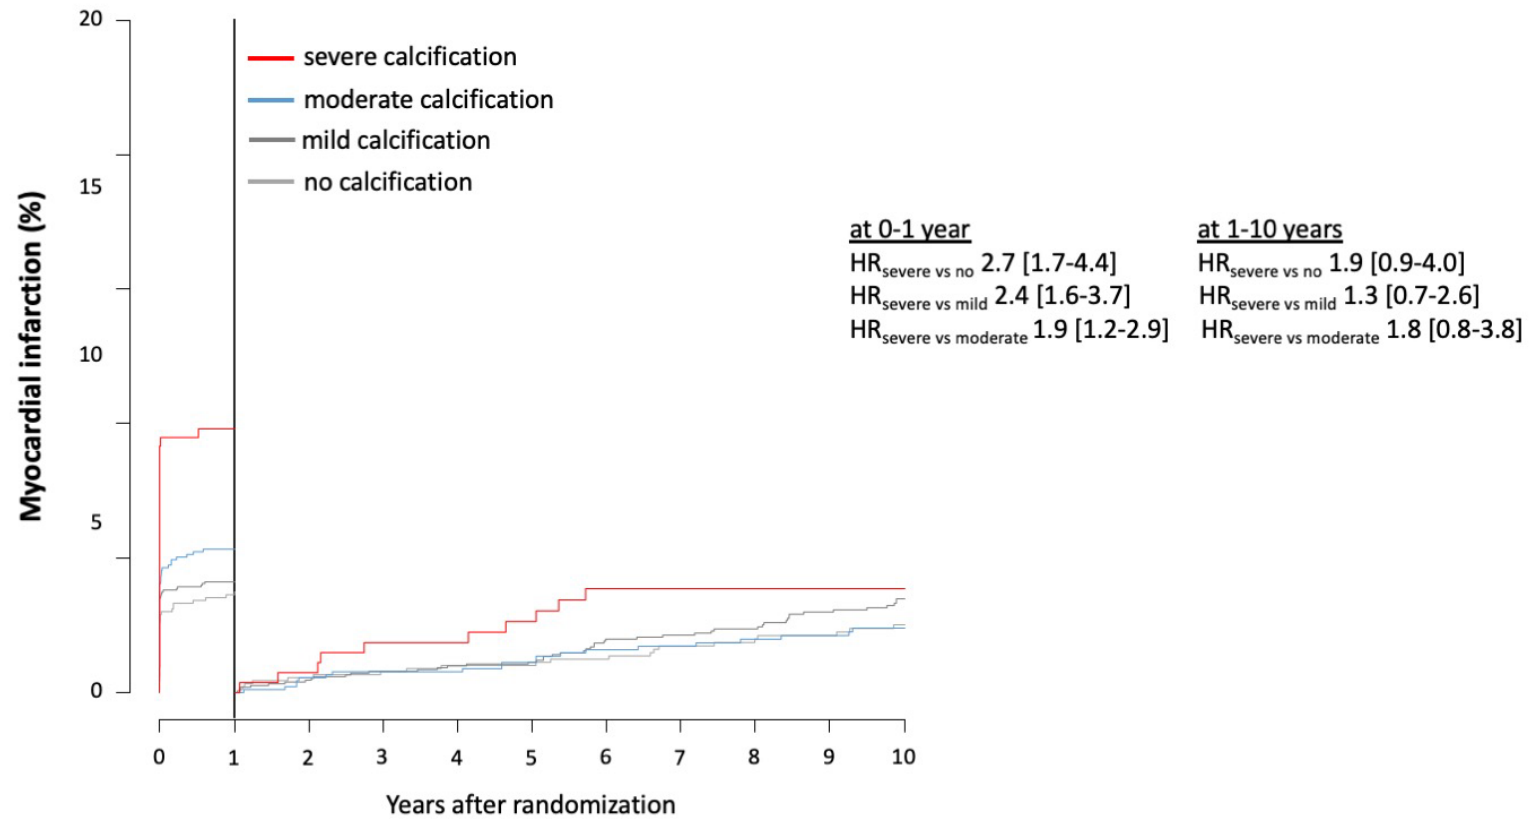



### 3D.

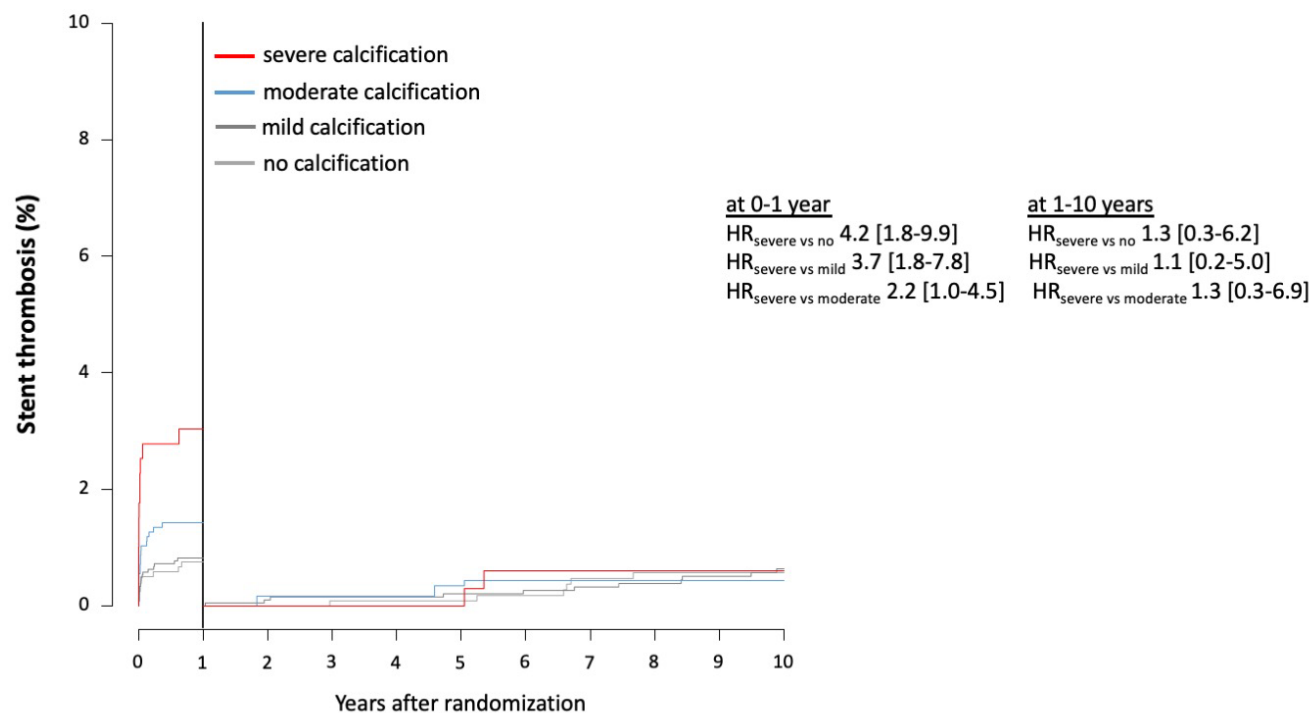

**Supplementary Figure 3.** Kaplan-Meier curves and landmark analyses.

- A) Kaplan-Meier curves and results of landmark analysis at 0-1 and 1-10 years for all-cause mortality.
- B) Kaplan-Meier curves and results of landmark analysis at 0-1 and 1-10 years for target lesion revascularisation.
- C) Kaplan-Meier curves and results of landmark analysis at 0-1 and 1-10 years for myocardial infarction.
- D) Kaplan-Meier curves and results of landmark analysis at 0-1 and 1-10 years for stent thrombosis.

All-cause mortality

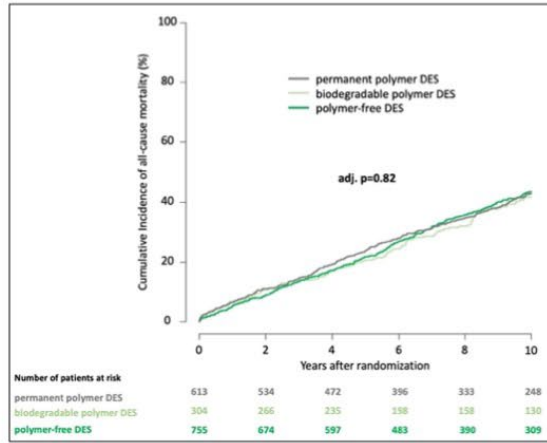

Target lesion revascularization

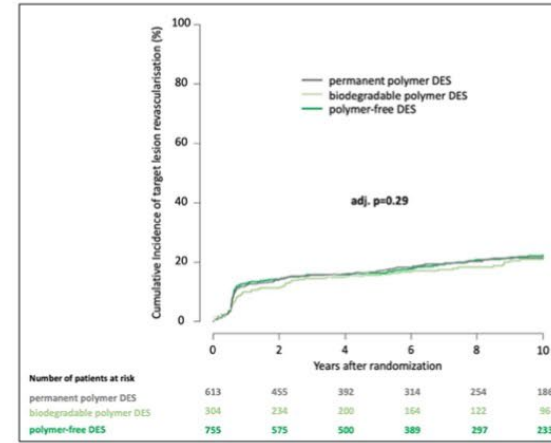

Myocardial infarction

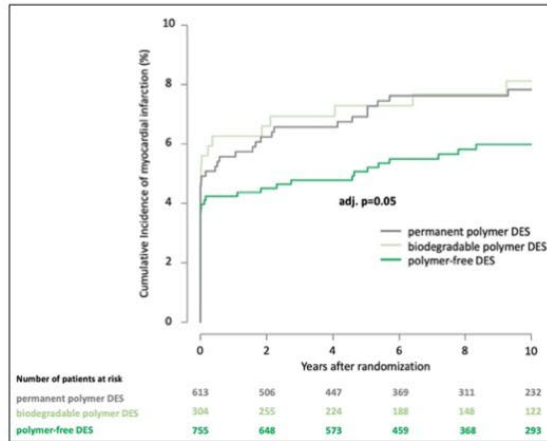

Stent thrombosis

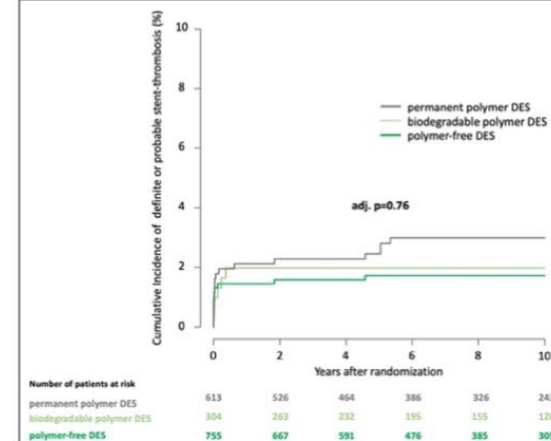

**Supplementary Figure 4.** Ten-year clinical outcomes according to different polymer coating strategies in patients with moderate-severe coronary calcification.
